# Supplementary material
Source: PubMed Central journal article supplement (PMC6591113)

**Supplementary figure 1** A) Study timeline. B) Two 9-minute stimulation segments were applied (NS stands for needle stimulation). The interval between segments was about 3 minutes, during which we asked about the sensations evoked by treatments. All treatments were applied in the MRI scanner. C) Location of real acupoints (red dots) and sham points (blue dots).

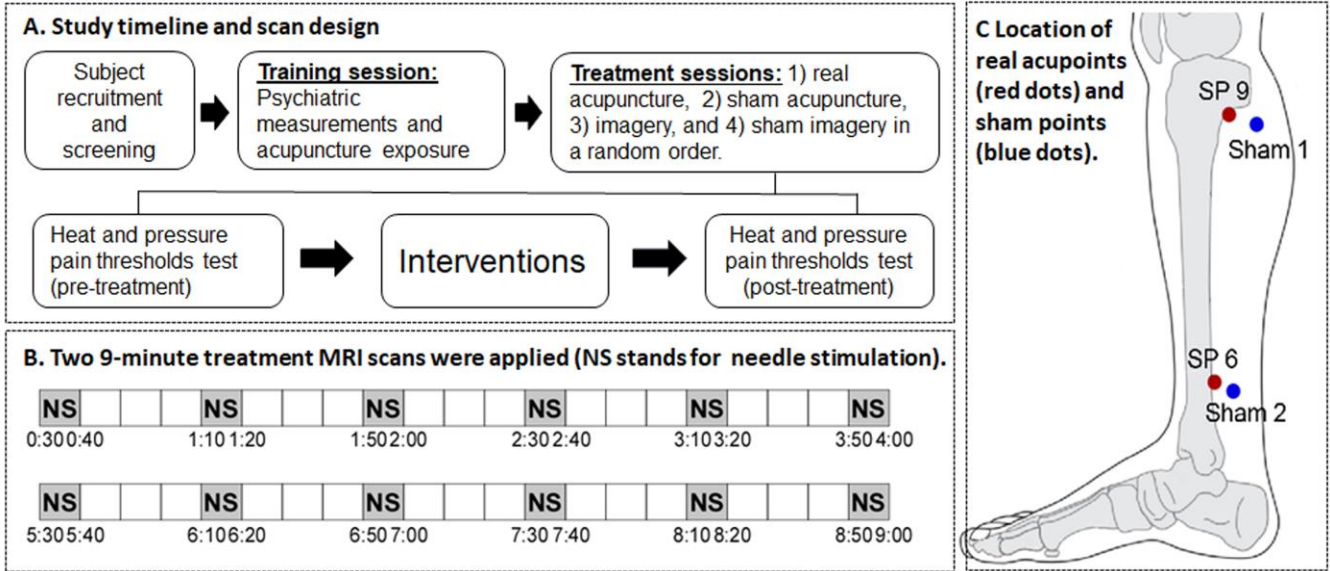

Supplement: NIHMS1022300-supplement-1.pdf [file NIHMS1022300-supplement-1.pdf]
